# Supplementary material for: Bottled Up or Poured Out: How Product Name Emotions Affect Appeal and Authenticity in the Market for Craft Beer
Source: Atypon-hosted journal article supplement (doi:10.1287/stsc.2022.0178), 2022-12-28
Supplement: stsc.2022.0178.sm1.pdf [file stsc.2022.0178.sm1.pdf]

## ONLINE APPENDIX

This appendix provides tables with all robustness checks mentioned but not reported in the manuscript.

**Table A1.** GEE Models: Effects of Beer Name Emotionality on Beer Appeal and Beer Authenticity Controlling for Discounted (by 20%) Beer Cumulative Medals

|                                                       | <b>Model<br/>(A1.1)</b>      | <b>Model<br/>(A1.2)</b>     | <b>Model<br/>(A1.3)</b>      | <b>Model<br/>(A1.4)</b>     | <b>Model<br/>(A1.5)</b>     | <b>Model<br/>(A1.6)</b>     |
|-------------------------------------------------------|------------------------------|-----------------------------|------------------------------|-----------------------------|-----------------------------|-----------------------------|
|                                                       | <i>DV: Appeal</i>            |                             |                              | <i>DV: Authenticity</i>     |                             |                             |
| Density of beers (t-1)                                | -0.043***<br>(0.009)         | -0.043***<br>(0.009)        | -0.043***<br>(0.009)         | 3.128***<br>(0.303)         | 3.126***<br>(0.303)         | 3.126***<br>(0.303)         |
| Density of beers squared (t-1)                        | 0.001***<br>(0.000)          | 0.001***<br>(0.000)         | 0.001***<br>(0.000)          | -0.143***<br>(0.009)        | -0.143***<br>(0.009)        | -0.143***<br>(0.009)        |
| Pre-1996 brewery = 1                                  | 0.032***<br>(0.008)          | 0.030***<br>(0.008)         | 0.032***<br>(0.008)          | 0.837***<br>(0.155)         | 0.833***<br>(0.155)         | 0.836***<br>(0.155)         |
| Regional brewery = 1 (t-1)                            | -0.024***<br>(0.005)         | -0.023***<br>(0.005)        | -0.024***<br>(0.005)         | 1.938***<br>(0.173)         | 1.940***<br>(0.172)         | 1.940***<br>(0.172)         |
| Contract brewery = 1 (t-1)                            | -0.049***<br>(0.012)         | -0.048***<br>(0.012)        | -0.048***<br>(0.012)         | 0.698***<br>(0.203)         | 0.702***<br>(0.203)         | 0.702***<br>(0.203)         |
| Adjunct brewery = 1 (t-1)                             | -0.184***<br>(0.019)         | -0.184***<br>(0.019)        | -0.184***<br>(0.019)         | 0.743<br>(0.529)            | 0.741<br>(0.528)            | 0.741<br>(0.528)            |
| Acquired brewery = 1 (t-1)                            | -0.154***<br>(0.023)         | -0.155***<br>(0.023)        | -0.154***<br>(0.023)         | -2.901***<br>(0.690)        | -2.894***<br>(0.689)        | -2.893***<br>(0.689)        |
| Brewery tenure (t)                                    | -0.014***<br>(0.001)         | -0.014***<br>(0.001)        | -0.014***<br>(0.001)         | 0.021<br>(0.023)            | 0.022<br>(0.023)            | 0.023<br>(0.023)            |
| Brewery cumulative beer style count (t-1)             | 0.024***<br>(0.001)          | 0.024***<br>(0.001)         | 0.024***<br>(0.001)          | 0.068+<br>(0.037)           | 0.068+<br>(0.036)           | 0.068+<br>(0.036)           |
| Average reviewer experience (t-1)                     | 0.001+<br>(0.001)            | 0.001+<br>(0.001)           | 0.001+<br>(0.001)            | -0.067***<br>(0.011)        | -0.067***<br>(0.011)        | -0.067***<br>(0.011)        |
| <b>Beer cumulative medals won: discount 20% (t-1)</b> | <b>0.048***<br/>(0.008)</b>  | <b>0.048***<br/>(0.008)</b> | <b>0.048***<br/>(0.008)</b>  | <b>1.900***<br/>(0.499)</b> | <b>1.900***<br/>(0.498)</b> | <b>1.900***<br/>(0.498)</b> |
| American lager style dummy = 1                        | -0.540***<br>(0.021)         | -0.543***<br>(0.021)        | -0.540***<br>(0.021)         | -1.779***<br>(0.190)        | -1.780***<br>(0.190)        | -1.773***<br>(0.190)        |
| Beer name word count                                  | -0.005*<br>(0.002)           | -0.005*<br>(0.002)          | -0.005*<br>(0.002)           | -0.027<br>(0.044)           | -0.029<br>(0.044)           | -0.029<br>(0.044)           |
| Oppositional beer name = 1                            | 0.140***<br>(0.011)          | 0.136***<br>(0.011)         | 0.141***<br>(0.011)          | -0.255<br>(0.179)           | -0.245<br>(0.178)           | -0.235<br>(0.179)           |
| Beer review word count (t-1)                          |                              |                             |                              | 0.125***<br>(0.033)         | 0.126***<br>(0.033)         | 0.126***<br>(0.033)         |
| Beer perceived authenticity (t-1)                     | 0.002***<br>(0.000)          | 0.002***<br>(0.000)         | 0.002***<br>(0.000)          |                             |                             |                             |
| <b>Beer name positive emotionality</b>                | <b>-0.165***<br/>(0.035)</b> |                             | <b>-0.166***<br/>(0.035)</b> | <b>-0.368<br/>(0.494)</b>   |                             | <b>-0.381<br/>(0.495)</b>   |
| <b>Beer name negative emotionality</b>                |                              | <b>0.062*<br/>(0.031)</b>   | <b>0.064*<br/>(0.031)</b>    |                             | <b>1.872*<br/>(0.815)</b>   | <b>1.875*<br/>(0.815)</b>   |
| Constant                                              | 4.11***<br>(0.094)           | 4.11***<br>(0.094)          | 4.11***<br>(0.094)           | -11.96***<br>(2.518)        | -11.98***<br>(2.518)        | -11.99***<br>(2.518)        |
| Beer style dummies                                    | Yes                          | Yes                         | Yes                          | Yes                         | Yes                         | Yes                         |
| Year dummies                                          | Yes                          | Yes                         | Yes                          | Yes                         | Yes                         | Yes                         |
| State dummies                                         | Yes                          | Yes                         | Yes                          | Yes                         | Yes                         | Yes                         |
| N of beers                                            | 17,401                       | 17,401                      | 17,401                       | 17,401                      | 17,401                      | 16,056                      |
| N of beer-year observations                           | 50,034                       | 50,034                      | 50,034                       | 50,034                      | 50,034                      | 45,767                      |
| Scale parameter                                       | 0.1597                       | 0.1599                      | 0.1596                       | 88.964                      | 88.853                      | 88.852                      |
| Wald Chi-square (d.f.)                                | 3,190 (87)                   | 3,180 (87)                  | 3,195 (88)                   | 3,241 (87)                  | 3,248 (87)                  | 3,248 (88)                  |

+p<0.1, \*p<0.05, \*\*p<0.01, \*\*\*p<0.001; two-tailed tests; robust standard errors clustered on beer in parentheses

Note: Refuting a quality-based alternative explanation: Introducing a time-decay function of the control variable *beer cumulative medals won* does not alter key findings

**Table A2:** GEE Models: Effects of Beer Name Emotionality on Beer Appeal and Beer Authenticity Controlling for *Brewery Cumulative Medals*

|                                                   | Model<br>(A2.1)              | Model<br>(A2.2)             | Model<br>(A2.3)              | Model<br>(A2.4)             | Model<br>(A2.5)             | Model<br>(A2.6)             |
|---------------------------------------------------|------------------------------|-----------------------------|------------------------------|-----------------------------|-----------------------------|-----------------------------|
|                                                   | <i>DV: Appeal</i>            |                             |                              | <i>DV: Authenticity</i>     |                             |                             |
| Density of beers (t-1)                            | -0.041***<br>(0.009)         | -0.041***<br>(0.009)        | -0.041***<br>(0.009)         | 3.155***<br>(0.303)         | 3.153***<br>(0.303)         | 3.153***<br>(0.303)         |
| Density of beers squared (t-1)                    | 0.001***<br>(0.000)          | 0.001***<br>(0.000)         | 0.001***<br>(0.000)          | -0.144***<br>(0.009)        | -0.144***<br>(0.009)        | -0.144***<br>(0.009)        |
| Pre-1996 brewery = 1                              | 0.024**<br>(0.008)           | 0.023**<br>(0.008)          | 0.024**<br>(0.008)           | 0.757***<br>(0.158)         | 0.754***<br>(0.158)         | 0.757***<br>(0.157)         |
| Regional brewery = 1 (t-1)                        | -0.024***<br>(0.005)         | -0.024***<br>(0.005)        | -0.024***<br>(0.005)         | 1.955***<br>(0.175)         | 1.957***<br>(0.174)         | 1.957***<br>(0.174)         |
| Contract brewery = 1 (t-1)                        | -0.048***<br>(0.012)         | -0.048***<br>(0.012)        | -0.048***<br>(0.012)         | 0.713***<br>(0.202)         | 0.717***<br>(0.202)         | 0.716***<br>(0.202)         |
| Adjunct brewery = 1 (t-1)                         | -0.188***<br>(0.019)         | -0.188***<br>(0.019)        | -0.188***<br>(0.019)         | 0.694<br>(0.532)            | 0.692<br>(0.532)            | 0.692<br>(0.532)            |
| Acquired brewery = 1 (t-1)                        | -0.157***<br>(0.023)         | -0.157***<br>(0.023)        | -0.157***<br>(0.023)         | -2.950***<br>(0.697)        | -2.943***<br>(0.695)        | -2.942***<br>(0.695)        |
| Brewery tenure (t)                                | -0.014***<br>(0.001)         | -0.014***<br>(0.001)        | -0.014***<br>(0.001)         | 0.012<br>(0.022)            | 0.013<br>(0.022)            | 0.013<br>(0.022)            |
| Brewery cumulative beer style count (t-1)         | 0.020***<br>(0.001)          | 0.020***<br>(0.001)         | 0.020***<br>(0.001)          | 0.048<br>(0.038)            | 0.048<br>(0.038)            | 0.048<br>(0.038)            |
| <b><i>Brewery cumulative medals won (t-1)</i></b> | <b>0.003***<br/>(0.000)</b>  | <b>0.003***<br/>(0.000)</b> | <b>0.003***<br/>(0.000)</b>  | <b>0.034***<br/>(0.010)</b> | <b>0.034***<br/>(0.010)</b> | <b>0.034***<br/>(0.010)</b> |
| Average reviewer experience (t-1)                 | 0.001<br>(0.001)             | 0.001<br>(0.001)            | 0.001<br>(0.001)             | -0.068***<br>(0.012)        | -0.069***<br>(0.012)        | -0.069***<br>(0.012)        |
| American lager style dummy = 1                    | -0.538***<br>(0.021)         | -0.541***<br>(0.022)        | -0.538***<br>(0.021)         | -1.753***<br>(0.190)        | -1.754***<br>(0.191)        | -1.747***<br>(0.190)        |
| Beer name word count                              | -0.005*<br>(0.002)           | -0.005*<br>(0.002)          | -0.005*<br>(0.002)           | -0.023<br>(0.044)           | -0.025<br>(0.044)           | -0.025<br>(0.044)           |
| Oppositional beer name = 1                        | 0.140***<br>(0.011)          | 0.136***<br>(0.011)         | 0.141***<br>(0.011)          | -0.270<br>(0.180)           | -0.261<br>(0.179)           | -0.251<br>(0.180)           |
| Beer review word count (t-1)                      |                              |                             |                              | 0.125***<br>(0.033)         | 0.125***<br>(0.033)         | 0.125***<br>(0.033)         |
| Beer perceived authenticity (t-1)                 | 0.002***<br>(0.000)          | 0.002***<br>(0.000)         | 0.002***<br>(0.000)          |                             |                             |                             |
| <b>Beer name positive emotionality</b>            | <b>-0.169***<br/>(0.035)</b> |                             | <b>-0.169***<br/>(0.035)</b> | <b>-0.383<br/>(0.494)</b>   |                             | <b>-0.396<br/>(0.495)</b>   |
| <b>Beer name negative emotionality</b>            |                              | <b>0.061+<br/>(0.031)</b>   | <b>0.062*<br/>(0.031)</b>    |                             | <b>1.877*<br/>(0.819)</b>   | <b>1.879*<br/>(0.819)</b>   |
| Constant                                          | 4.09***<br>(0.093)           | 4.09***<br>(0.093)          | 4.09***<br>(0.093)           | -11.95***<br>(2.537)        | -11.98***<br>(2.537)        | -11.98***<br>(2.536)        |
| Beer style dummies                                | <i>Yes</i>                   | <i>Yes</i>                  | <i>Yes</i>                   | <i>Yes</i>                  | <i>Yes</i>                  | <i>Yes</i>                  |
| Year dummies                                      | <i>Yes</i>                   | <i>Yes</i>                  | <i>Yes</i>                   | <i>Yes</i>                  | <i>Yes</i>                  | <i>Yes</i>                  |
| State dummies                                     | <i>Yes</i>                   | <i>Yes</i>                  | <i>Yes</i>                   | <i>Yes</i>                  | <i>Yes</i>                  | <i>Yes</i>                  |
| N of beers                                        | 17,401                       | 17,401                      | 17,401                       | 16,056                      | 16,056                      | 16,056                      |
| N of beer-year observations                       | 50,034                       | 50,034                      | 50,034                       | 45,767                      | 45,767                      | 45,767                      |
| Scale parameter                                   | 0.1592                       | 0.1593                      | 0.1591                       | 89.653                      | 89.542                      | 88.540                      |
| Wald Chi-square (d.f.)                            | 3,294.23<br>(87)             | 3,279.80<br>(87)            | 3,922.32<br>(88)             | 3,207.64<br>(87)            | 3,214.40<br>(87)            | 3,214.72<br>(88)            |

+p<0.1, \*p<0.05, \*\*p<0.01, \*\*\*p<0.001; two-tailed tests; robust standard errors clustered on beer in parentheses

Note: Refuting a quality-based alternative explanation: Introducing a brewery-level control for medals, *brewery cumulative medals won*, does not alter key findings

**Table A3:** GEE Models: Effects of Beer Name Emotionality on Beer Appeal and Beer Authenticity Controlling for Discounted (by 20%) Brewery Cumulative Medals

|                                                          | Model<br>(A3.1)              | Model<br>(A3.2)             | Model<br>(A3.3)              | Model<br>(A3.4)             | Model<br>(A3.5)             | Model<br>(A3.6)             |
|----------------------------------------------------------|------------------------------|-----------------------------|------------------------------|-----------------------------|-----------------------------|-----------------------------|
|                                                          | <i>DV: Appeal</i>            |                             |                              | <i>DV: Authenticity</i>     |                             |                             |
| Density of beers (t-1)                                   | -0.041***<br>(0.009)         | -0.041***<br>(0.009)        | -0.041***<br>(0.009)         | 3.156***<br>(0.303)         | 3.154***<br>(0.303)         | 3.154***<br>(0.303)         |
| Density of beers squared (t-1)                           | 0.001***<br>(0.000)          | 0.001***<br>(0.000)         | 0.001***<br>(0.000)          | -0.144***<br>(0.010)        | -0.144***<br>(0.010)        | -0.144***<br>(0.010)        |
| Pre-1996 brewery = 1                                     | 0.030***<br>(0.008)          | 0.029***<br>(0.008)         | 0.030***<br>(0.008)          | 0.824***<br>(0.157)         | 0.821***<br>(0.157)         | 0.824***<br>(0.157)         |
| Regional brewery = 1 (t-1)                               | -0.024***<br>(0.005)         | -0.024***<br>(0.005)        | -0.024***<br>(0.005)         | 1.956***<br>(0.175)         | 1.957***<br>(0.174)         | 1.957***<br>(0.174)         |
| Contract brewery = 1 (t-1)                               | -0.045***<br>(0.012)         | -0.044***<br>(0.012)        | -0.045***<br>(0.012)         | 0.741***<br>(0.202)         | 0.745***<br>(0.202)         | 0.745***<br>(0.202)         |
| Adjunct brewery = 1 (t-1)                                | -0.187***<br>(0.019)         | -0.187***<br>(0.019)        | -0.187***<br>(0.019)         | 0.710<br>(0.533)            | 0.708<br>(0.532)            | 0.708<br>(0.532)            |
| Acquired brewery = 1 (t-1)                               | -0.153***<br>(0.023)         | -0.153***<br>(0.023)        | -0.152***<br>(0.023)         | -2.908***<br>(0.695)        | -2.901***<br>(0.694)        | -2.901***<br>(0.694)        |
| Brewery tenure (t)                                       | -0.014***<br>(0.001)         | -0.014***<br>(0.001)        | -0.014***<br>(0.001)         | 0.017<br>(0.023)            | 0.018<br>(0.023)            | 0.018<br>(0.023)            |
| Brewery cumulative beer style count (t-1)                | 0.020***<br>(0.001)          | 0.020***<br>(0.001)         | 0.020***<br>(0.001)          | 0.051<br>(0.038)            | 0.051<br>(0.038)            | 0.051<br>(0.038)            |
| <b>Brewery cumulative medals won: discount 20% (t-1)</b> | <b>0.006***<br/>(0.001)</b>  | <b>0.006***<br/>(0.001)</b> | <b>0.006***<br/>(0.001)</b>  | <b>0.061***<br/>(0.018)</b> | <b>0.061***<br/>(0.018)</b> | <b>0.061***<br/>(0.018)</b> |
| Average reviewer experience (t-1)                        | 0.001<br>(0.001)             | 0.001<br>(0.001)            | 0.001<br>(0.001)             | -0.068***<br>(0.012)        | -0.068***<br>(0.012)        | -0.068***<br>(0.012)        |
| American lager style dummy = 1                           | -0.539***<br>(0.021)         | -0.541***<br>(0.022)        | -0.538***<br>(0.021)         | -1.756***<br>(0.190)        | -1.757***<br>(0.190)        | -1.751***<br>(0.190)        |
| Beer name word count                                     | -0.005*<br>(0.002)           | -0.005*<br>(0.002)          | -0.005*<br>(0.002)           | -0.022<br>(0.044)           | -0.024<br>(0.044)           | -0.024<br>(0.044)           |
| Oppositional beer name = 1                               | 0.139***<br>(0.011)          | 0.135***<br>(0.011)         | 0.140***<br>(0.011)          | -0.277<br>(0.180)           | -0.267<br>(0.179)           | -0.257<br>(0.180)           |
| Beer review word count (t-1)                             |                              |                             |                              | 0.125***<br>(0.033)         | 0.125***<br>(0.033)         | 0.125***<br>(0.033)         |
| Beer perceived authenticity (t-1)                        | 0.002***<br>(0.000)          | 0.002***<br>(0.000)         | 0.002***<br>(0.000)          |                             |                             |                             |
| <b>Beer name positive emotionality</b>                   | <b>-0.168***<br/>(0.035)</b> |                             | <b>-0.169***<br/>(0.035)</b> | <b>-0.373<br/>(0.494)</b>   |                             | <b>-0.386<br/>(0.495)</b>   |
| <b>Beer name negative emotionality</b>                   |                              | <b>0.061*<br/>(0.031)</b>   | <b>0.063*<br/>(0.031)</b>    |                             | <b>1.887*<br/>(0.818)</b>   | <b>1.890*<br/>(0.818)</b>   |
| Constant                                                 | 4.101***<br>(0.093)          | 4.101***<br>(0.093)         | 4.100***<br>(0.093)          | -11.86***<br>(2.534)        | -11.89***<br>(2.534)        | -11.89***<br>(2.534)        |
| Beer style dummies                                       | <i>Yes</i>                   | <i>Yes</i>                  | <i>Yes</i>                   | <i>Yes</i>                  | <i>Yes</i>                  | <i>Yes</i>                  |
| Year dummies                                             | <i>Yes</i>                   | <i>Yes</i>                  | <i>Yes</i>                   | <i>Yes</i>                  | <i>Yes</i>                  | <i>Yes</i>                  |
| State dummies                                            | <i>Yes</i>                   | <i>Yes</i>                  | <i>Yes</i>                   | <i>Yes</i>                  | <i>Yes</i>                  | <i>Yes</i>                  |
| N of beers                                               | 17,401                       | 17,401                      | 17,401                       | 16,056                      | 16,056                      | 16,056                      |
| N of beer-year observations                              | 50,034                       | 50,034                      | 50,034                       | 45,767                      | 45,767                      | 45,767                      |
| Scale parameter                                          | 0.1592                       | 0.1594                      | 0.1592                       | 89.728                      | 89.617                      | 89.615                      |
| Wald Chi-square (d.f.)                                   | 3,302.21<br>(87)             | 3,289.21<br>(87)            | 3,307.14<br>(88)             | 3,204.24<br>(87)            | 3,210.90<br>(87)            | 3,2111.22<br>(88)           |

+p<0.1, \*p<0.05, \*\*p<0.01, \*\*\*p<0.001; two-tailed tests; robust standard errors clustered on beer in parentheses

Note: Refuting a quality-based alternative explanation: Introducing a time-decay function of the control variable *brewery cumulative medals won* does not alter key findings

**Table A4:** GEE Models: Effects of Beer Name Emotionality on Beer Appeal and Beer Authenticity Controlling for Perceived Beer Quality

|                                              | <b>Model<br/>(A4.1)</b>      | <b>Model<br/>(A4.2)</b>   | <b>Model<br/>(A4.3)</b>      | <b>Model<br/>(A4.4)</b>   | <b>Model<br/>(A4.5)</b>   | <b>Model<br/>(A4.6)</b>   |
|----------------------------------------------|------------------------------|---------------------------|------------------------------|---------------------------|---------------------------|---------------------------|
|                                              | <i>DV: Appeal</i>            |                           |                              | <i>DV: Authenticity</i>   |                           |                           |
| Density of beers (t-1)                       | -0.043***<br>(0.009)         | -0.043***<br>(0.009)      | -0.043***<br>(0.010)         | 3.099***<br>(0.301)       | 3.097***<br>(0.301)       | 3.097***<br>(0.301)       |
| Density of beers squared (t-1)               | 0.001***<br>(0.000)          | 0.001***<br>(0.000)       | 0.001***<br>(0.000)          | -0.142***<br>(0.009)      | -0.142***<br>(0.009)      | -0.142***<br>(0.009)      |
| Pre-1996 brewery = 1                         | 0.032***<br>(0.008)          | 0.031***<br>(0.008)       | 0.032***<br>(0.008)          | 0.833***<br>(0.155)       | 0.828***<br>(0.155)       | 0.832***<br>(0.155)       |
| Regional brewery = 1 (t-1)                   | -0.023***<br>(0.005)         | -0.023***<br>(0.005)      | -0.023***<br>(0.005)         | 1.908***<br>(0.169)       | 1.910***<br>(0.169)       | 1.910***<br>(0.169)       |
| Contract brewery = 1 (t-1)                   | -0.049***<br>(0.012)         | -0.048***<br>(0.012)      | -0.048***<br>(0.012)         | 0.717***<br>(0.204)       | 0.721***<br>(0.204)       | 0.720***<br>(0.204)       |
| Adjunct brewery = 1 (t-1)                    | -0.183***<br>(0.019)         | -0.184***<br>(0.019)      | -0.184***<br>(0.019)         | 0.738<br>(0.518)          | 0.736<br>(0.518)          | 0.736<br>(0.518)          |
| Acquired brewery = 1 (t-1)                   | -0.154***<br>(0.023)         | -0.154***<br>(0.023)      | -0.154***<br>(0.023)         | -2.832***<br>(0.668)      | -2.825***<br>(0.666)      | -2.824***<br>(0.666)      |
| Brewery tenure (t)                           | -0.014***<br>(0.001)         | -0.014***<br>(0.001)      | -0.014***<br>(0.001)         | 0.017<br>(0.022)          | 0.018<br>(0.022)          | 0.019<br>(0.022)          |
| Brewery cumulative<br>beer style count (t-1) | 0.024***<br>(0.001)          | 0.024***<br>(0.001)       | 0.024***<br>(0.001)          | 0.053<br>(0.035)          | 0.053<br>(0.035)          | 0.053<br>(0.035)          |
| Average reviewer experience (t-1)            | 0.001+<br>(0.001)            | 0.001+<br>(0.001)         | 0.001+<br>(0.001)            | -0.065***<br>(0.011)      | -0.066***<br>(0.011)      | -0.066***<br>(0.011)      |
| Beer cumulative medals won (t-1)             | 0.023***<br>(0.005)          | 0.023***<br>(0.005)       | 0.023***<br>(0.005)          | 1.853***<br>(0.448)       | 1.852***<br>(0.448)       | 1.852***<br>(0.448)       |
| <b>Beer perceived quality (t-1)</b>          | <b>-0.000<br/>(0.000)</b>    | <b>-0.000<br/>(0.000)</b> | <b>-0.000<br/>(0.000)</b>    | <b>0.004+<br/>(0.002)</b> | <b>0.004+<br/>(0.002)</b> | <b>0.004+<br/>(0.002)</b> |
| American lager style dummy = 1               | -0.540***<br>(0.021)         | -0.543***<br>(0.021)      | -0.540***<br>(0.021)         | -1.801***<br>(0.191)      | -1.803***<br>(0.191)      | -1.795***<br>(0.191)      |
| Beer name word count                         | -0.005*<br>(0.002)           | -0.005*<br>(0.002)        | -0.005*<br>(0.002)           | -0.018<br>(0.044)         | -0.020<br>(0.044)         | -0.021<br>(0.044)         |
| Oppositional beer name = 1                   | 0.140***<br>(0.011)          | 0.136***<br>(0.011)       | 0.141***<br>(0.011)          | -0.220<br>(0.180)         | -0.213<br>(0.179)         | -0.201<br>(0.180)         |
| Beer review word count (t-1)                 |                              |                           |                              | 0.011<br>(0.065)          | 0.012<br>(0.065)          | 0.012<br>(0.065)          |
| Beer perceived authenticity (t-1)            | 0.002***<br>(0.000)          | 0.002***<br>(0.000)       | 0.002***<br>(0.000)          |                           |                           |                           |
| <b>Beer name positive emotionality</b>       | <b>-0.165***<br/>(0.035)</b> |                           | <b>-0.166***<br/>(0.035)</b> | <b>-0.448<br/>(0.491)</b> |                           | <b>-0.462<br/>(0.492)</b> |
| <b>Beer name negative emotionality</b>       |                              | <b>0.063*<br/>(0.031)</b> | <b>0.064*<br/>(0.031)</b>    |                           | <b>1.901*<br/>(0.820)</b> | <b>1.905*<br/>(0.820)</b> |
| Constant                                     | 4.12***<br>(0.093)           | 4.12***<br>(0.093)        | 4.12***<br>(0.093)           | -11.82***<br>(2.507)      | -11.84***<br>(2.507)      | -11.85***<br>(2.507)      |
| Beer style dummies                           | Yes                          | Yes                       | Yes                          | Yes                       | Yes                       | Yes                       |
| Year dummies                                 | Yes                          | Yes                       | Yes                          | Yes                       | Yes                       | Yes                       |
| State dummies                                | Yes                          | Yes                       | Yes                          | Yes                       | Yes                       | Yes                       |
| N of beers                                   | 17,401                       | 17,401                    | 17,401                       | 16,056                    | 16,056                    | 16,056                    |
| N of beer-year observations                  | 50,034                       | 50,034                    | 50,034                       | 45,767                    | 45,767                    | 45,767                    |
| Scale parameter                              | 0.1598                       | 0.1600                    | 0.1597                       | 87.972                    | 87.862                    | 87.859                    |
| Wald Chi-square<br>(d.f.)                    | 3,147.42<br>(88)             | 3,137.28<br>(88)          | 3,152.73<br>(89)             | 3,266.89<br>(88)          | 3,273.00<br>(88)          | 3,273.61<br>(89)          |

+p<0.1, \*p<0.05, \*\*p<0.01, \*\*\*p<0.001; two-tailed tests; robust standard errors clustered on beer in parentheses

Note: Refuting a quality-based alternative explanation: Introducing a control for *beer perceived quality* does not alter key findings

**Table A5.** GEE Models: Beer-level Effects of Beer Name Emotionality on Beer Appeal of American Ales only

|                                              | <b>Model<br/>(A5.1)</b>                          | <b>Model<br/>(A5.2)</b>                          | <b>Model<br/>(A5.3)</b>                          | <b>Model<br/>(A5.4)</b>                          | <b>Model<br/>(A5.5)</b>                          | <b>Model<br/>(R5.6)</b>                          |
|----------------------------------------------|--------------------------------------------------|--------------------------------------------------|--------------------------------------------------|--------------------------------------------------|--------------------------------------------------|--------------------------------------------------|
|                                              | <i>American<br/>Ales only<br/>Above<br/>Mean</i> | <i>American<br/>Ales only<br/>Below<br/>Mean</i> | <i>American<br/>Ales only<br/>Above<br/>Mean</i> | <i>American<br/>Ales only<br/>Below<br/>Mean</i> | <i>American<br/>Ales only<br/>Above<br/>Mean</i> | <i>American<br/>Ales only<br/>Below<br/>Mean</i> |
| Density of beers (t-1)                       | -0.042**<br>(0.014)                              | -0.005<br>(0.021)                                | -0.042**<br>(0.014)                              | -0.002<br>(0.019)                                | -0.042**<br>(0.014)                              | -0.002<br>(0.019)                                |
| Density of beers squared (t-1)               | 0.001***<br>(0.000)                              | 0.000<br>(0.001)                                 | 0.001***<br>(0.000)                              | -0.000<br>(0.001)                                | 0.001***<br>(0.000)                              | -0.000<br>(0.001)                                |
| Pre-1996 brewery = 1                         | -0.022*<br>(0.009)                               | 0.037**<br>(0.013)                               | -0.023*<br>(0.009)                               | 0.038**<br>(0.013)                               | -0.022*<br>(0.009)                               | 0.038**<br>(0.013)                               |
| Regional brewery = 1 (t-1)                   | -0.010<br>(0.006)                                | -0.036***<br>(0.010)                             | -0.009<br>(0.006)                                | -0.035***<br>(0.010)                             | -0.010<br>(0.006)                                | -0.035***<br>(0.010)                             |
| Contract brewery = 1 (t-1)                   | -0.044**<br>(0.017)                              | -0.002<br>(0.019)                                | -0.044**<br>(0.017)                              | -0.000<br>(0.019)                                | -0.044**<br>(0.017)                              | -0.000<br>(0.019)                                |
| Adjunct brewery = 1 (t-1)                    | -0.038<br>(0.030)                                | -0.133***<br>(0.029)                             | -0.037<br>(0.030)                                | -0.135***<br>(0.029)                             | -0.038<br>(0.030)                                | -0.135***<br>(0.029)                             |
| Acquired brewery = 1 (t-1)                   | -0.071+<br>(0.042)                               | -0.038<br>(0.034)                                | -0.070+<br>(0.042)                               | -0.039<br>(0.035)                                | -0.070+<br>(0.042)                               | -0.039<br>(0.034)                                |
| Brewery tenure (t)                           | -0.010***<br>(0.001)                             | -0.009***<br>(0.002)                             | -0.010***<br>(0.001)                             | -0.009***<br>(0.002)                             | -0.010***<br>(0.001)                             | -0.009***<br>(0.002)                             |
| Brewery cumulative beer style<br>count (t-1) | 0.010***<br>(0.001)                              | 0.023***<br>(0.002)                              | 0.010***<br>(0.001)                              | 0.023***<br>(0.002)                              | 0.010***<br>(0.001)                              | 0.023***<br>(0.002)                              |
| Average reviewer experience (t-1)            | 0.001<br>(0.001)                                 | -0.001<br>(0.001)                                | 0.001<br>(0.001)                                 | -0.001<br>(0.001)                                | 0.001<br>(0.001)                                 | -0.001<br>(0.001)                                |
| Beer cumulative medals won (t-1)             | -0.004<br>(0.007)                                | 0.025*<br>(0.012)                                | -0.004<br>(0.007)                                | 0.027*<br>(0.012)                                | -0.004<br>(0.007)                                | 0.026*<br>(0.012)                                |
| Beer name word count                         | -0.002<br>(0.002)                                | -0.007+<br>(0.004)                               | -0.002<br>(0.002)                                | -0.007+<br>(0.004)                               | -0.002<br>(0.002)                                | -0.007+<br>(0.004)                               |
| Oppositional beer name = 1                   | 0.103***<br>(0.011)                              | 0.112***<br>(0.019)                              | 0.103***<br>(0.011)                              | 0.113***<br>(0.019)                              | 0.104***<br>(0.011)                              | 0.115***<br>(0.019)                              |
| Beer perceived authenticity (t-1)            | 0.000***<br>(0.000)                              | 0.006***<br>(0.001)                              | 0.000***<br>(0.000)                              | 0.006***<br>(0.001)                              | 0.000***<br>(0.000)                              | 0.006***<br>(0.001)                              |
| <b>Beer name positive emotionality</b>       | <b>-0.146**<br/>(0.045)</b>                      | <b>-0.200**<br/>(0.061)</b>                      |                                                  |                                                  | <b>-0.144**<br/>(0.044)</b>                      | <b>-0.193**<br/>(0.061)</b>                      |
| <b>Beer name negative emotionality</b>       |                                                  |                                                  | <b>0.082*<br/>(0.037)</b>                        | <b>0.205***<br/>(0.047)</b>                      | <b>0.079*<br/>(0.037)</b>                        | <b>0.197***<br/>(0.047)</b>                      |
| Constant                                     | 4.182***<br>(0.151)                              | 3.536***<br>(0.209)                              | 4.179***<br>(0.151)                              | 3.502***<br>(0.195)                              | 4.178***<br>(0.151)                              | 3.503***<br>(0.196)                              |
| Year dummies                                 | Yes                                              | Yes                                              | Yes                                              | Yes                                              | Yes                                              | Yes                                              |
| State dummies                                | Yes                                              | Yes                                              | Yes                                              | Yes                                              | Yes                                              | Yes                                              |
| N of beers                                   | 5,629                                            | 5,010                                            | 5,629                                            | 5,010                                            | 5,629                                            | 5,010                                            |
| N of beer-year observations                  | 12,909                                           | 10,495                                           | 12,909                                           | 10,495                                           | 12,909                                           | 10,495                                           |
| Scale parameter                              | 0.0636                                           | 0.1306                                           | 0.0635                                           | 0.1301                                           | 0.0634                                           | 0.1305                                           |
| Wald Chi-square<br>(d.f.)                    | 643.74<br>(73)                                   | 9,893.52<br>(74)                                 | 630.53<br>(73)                                   | 9,890.48<br>(74)                                 | 647.59<br>(74)                                   | 9,891.63<br>(75)                                 |

+p<0.1, \*p<0.05, \*\*p<0.01, \*\*\*p<0.001; two-tailed tests; robust standard errors clustered on beer in parentheses

Note: Refuting a preference-based alternative explanation: Restricting samples to only above-average rated or only below-average rated American Ale style beer-year observations does not alter key findings

**Table A6.** OLS Models: Review-level Effects of Beer Name Emotionality on Appeal of American Ales only Rated by Reviewers Who Prefer American Ales

|                                        | <b>Model<br/>(A6.1)</b>                     | <b>Model<br/>(A6.2)</b>                     |
|----------------------------------------|---------------------------------------------|---------------------------------------------|
|                                        | <i>American Ale<br/>only<br/>Above Mean</i> | <i>American Ale<br/>only<br/>Below Mean</i> |
| Pre-1996 brewery = 1                   | -0.050***<br>(0.003)                        | 0.031***<br>(0.005)                         |
| Regional Brewery = 1 (t-1)             | -0.021***<br>(0.003)                        | 0.023***<br>(0.006)                         |
| Contract Brewery = 1 (t-1)             | -0.028***<br>(0.007)                        | -0.049***<br>(0.012)                        |
| Adjunct Brewery = 1 (t-1)              | 0.098***<br>(0.011)                         | -0.230***<br>(0.017)                        |
| Acquired Brewery = 1 (t-1)             | 0.084***<br>(0.011)                         | -0.088***<br>(0.016)                        |
| Average reviewer experience (t-1)      | -0.001***<br>(0.000)                        | 0.000***<br>(0.000)                         |
| Beer Cumulative Medals Won (t-1)       | 0.027***<br>(0.002)                         | 0.021***<br>(0.004)                         |
| Beer name word count                   | -0.007***<br>(0.001)                        | -0.002<br>(0.002)                           |
| Oppositional beer name = 1             | -0.003<br>(0.004)                           | 0.036***<br>(0.009)                         |
| <b>Beer name positive emotionality</b> | <b>-0.041**</b><br><b>(0.014)</b>           | <b>0.039</b><br><b>(0.027)</b>              |
| <b>Beer name negative emotionality</b> | <b>0.044***</b><br><b>(0.008)</b>           | <b>0.074***</b><br><b>(0.022)</b>           |
| Constant                               | 4.552***<br>(0.059)                         | 3.869***<br>(0.116)                         |
| Year dummies                           | <i>Yes</i>                                  | <i>Yes</i>                                  |
| State dummies                          | <i>Yes</i>                                  | <i>Yes</i>                                  |
| N of review-beer observations          | 59,171                                      | 36,861                                      |
| R-squared                              | 0.07                                        | 0.04                                        |
| F-test                                 | n/a                                         | 440.58***                                   |
| (d.f.)                                 | (71)                                        | (72)                                        |

+p<0.1, \*p<0.05, \*\*p<0.01, \*\*\*p<0.001; two-tailed tests; robust standard errors in parentheses

Note: Refuting a preference-based alternative explanation: Restricting samples to review-level observations of only above-average rated or only below-average rated American Ales by reviewers who review American Ales at least one standard deviation above the website mean does not alter key findings

**Table A7.** OLS Models: Review-level Effects of Beer Name Emotionality on Appeal of Beer Dimensions of Look, Smell, Taste and Feel

|                                             | <b>Model<br/>(A7.1)</b>        | <b>Model<br/>(A7.2)</b>        | <b>Model<br/>(A7.3)</b>         | <b>Model<br/>(A7.4)</b>         | <b>Model<br/>(A7.5)</b>         | <b>Model<br/>(A7.6)</b>         | <b>Model<br/>(A7.7)</b>        | <b>Model<br/>(A7.8)</b>        |
|---------------------------------------------|--------------------------------|--------------------------------|---------------------------------|---------------------------------|---------------------------------|---------------------------------|--------------------------------|--------------------------------|
|                                             | <i>Look<br/>Above<br/>Mean</i> | <i>Look<br/>Below<br/>Mean</i> | <i>Smell<br/>Above<br/>Mean</i> | <i>Smell<br/>Below<br/>Mean</i> | <i>Taste<br/>Above<br/>Mean</i> | <i>Taste<br/>Below<br/>Mean</i> | <i>Feel<br/>Above<br/>Mean</i> | <i>Feel<br/>Below<br/>Mean</i> |
| Pre-1996 brewery = 1                        | -0.044***<br>(0.001)           | 0.032***<br>(0.002)            | -0.040***<br>(0.001)            | 0.052***<br>(0.002)             | -0.041***<br>(0.001)            | 0.050***<br>(0.002)             | -0.042***<br>(0.001)           | 0.043***<br>(0.002)            |
| Regional brewery=1 (t-1)                    | -0.002<br>(0.001)              | -0.005**<br>(0.002)            | 0.005***<br>(0.001)             | 0.003<br>(0.002)                | -0.002**<br>(0.001)             | -0.003*<br>(0.002)              | -0.007***<br>(0.001)           | -0.004*<br>(0.002)             |
| Contract brewery=1 (t-1)                    | -0.038***<br>(0.002)           | -0.022***<br>(0.003)           | -0.028***<br>(0.002)            | -0.007*<br>(0.003)              | -0.018***<br>(0.002)            | 0.001<br>(0.003)                | -0.026***<br>(0.002)           | -0.012***<br>(0.003)           |
| Adjunct brewery=1 (t-1)                     | -0.090***<br>(0.003)           | -0.147***<br>(0.004)           | -0.041***<br>(0.003)            | -0.145***<br>(0.004)            | -0.049***<br>(0.003)            | -0.120***<br>(0.004)            | -0.056***<br>(0.003)           | -0.133***<br>(0.004)           |
| Acquired brewery=1 (t-1)                    | -0.103***<br>(0.004)           | -0.137***<br>(0.005)           | -0.062***<br>(0.004)            | -0.149***<br>(0.004)            | -0.057***<br>(0.004)            | -0.113***<br>(0.004)            | -0.064***<br>(0.004)           | -0.134***<br>(0.004)           |
| Average reviewer<br>experience (t-1)        | -0.000***<br>(0.000)           | 0.000***<br>(0.000)            | -0.000***<br>(0.000)            | 0.000***<br>(0.000)             | -0.000***<br>(0.000)            | 0.000***<br>(0.000)             | -0.000***<br>(0.000)           | 0.000***<br>(0.000)            |
| Beer cumulative medals<br>won (t-1)         | 0.005***<br>(0.000)            | 0.008***<br>(0.000)            | 0.003***<br>(0.000)             | 0.007***<br>(0.000)             | 0.003***<br>(0.000)             | 0.006***<br>(0.000)             | 0.004***<br>(0.000)            | 0.006***<br>(0.000)            |
| Beer name word count                        | -0.003***<br>(0.000)           | -0.007***<br>(0.001)           | -0.003***<br>(0.000)            | -0.003***<br>(0.001)            | -0.002***<br>(0.000)            | -0.002***<br>(0.001)            | -0.002***<br>(0.000)           | -0.004***<br>(0.001)           |
| Oppositional beer name=1                    | 0.048***<br>(0.001)            | 0.088***<br>(0.003)            | 0.031***<br>(0.001)             | 0.050***<br>(0.003)             | 0.037***<br>(0.001)             | 0.056***<br>(0.003)             | 0.043***<br>(0.001)            | 0.071***<br>(0.003)            |
| <b>Beer name positive<br/>emotionality</b>  | <b>-0.055***<br/>(0.005)</b>   | <b>-0.040***<br/>(0.009)</b>   | <b>-0.041***<br/>(0.004)</b>    | <b>0.003<br/>(0.007)</b>        | <b>-0.058***<br/>(0.004)</b>    | <b>-0.015*<br/>(0.008)</b>      | <b>-0.065***<br/>(0.004)</b>   | <b>-0.031***<br/>(0.008)</b>   |
| <b>Beer name negative<br/>1emotionality</b> | <b>0.104***<br/>(0.004)</b>    | <b>0.026**<br/>(0.009)</b>     | <b>0.095***<br/>(0.003)</b>     | <b>0.065***<br/>(0.007)</b>     | <b>0.096***<br/>(0.003)</b>     | <b>0.039***<br/>(0.008)</b>     | <b>0.092***<br/>(0.003)</b>    | <b>0.056***<br/>(0.007)</b>    |
| Constant                                    | 4.147***<br>(0.054)            | 3.774***<br>(0.037)            | 4.086***<br>(0.046)             | 3.759***<br>(0.030)             | 3.896***<br>(0.018)             | 3.397***<br>(0.060)             | 3.903***<br>(0.018)            | 3.529***<br>(0.060)            |
| Beer style dummies                          | <i>Yes</i>                     | <i>Yes</i>                     | <i>Yes</i>                      | <i>Yes</i>                      | <i>Yes</i>                      | <i>Yes</i>                      | <i>Yes</i>                     | <i>Yes</i>                     |
| Year dummies                                | <i>Yes</i>                     | <i>Yes</i>                     | <i>Yes</i>                      | <i>Yes</i>                      | <i>Yes</i>                      | <i>Yes</i>                      | <i>Yes</i>                     | <i>Yes</i>                     |
| State dummies                               | <i>Yes</i>                     | <i>Yes</i>                     | <i>Yes</i>                      | <i>Yes</i>                      | <i>Yes</i>                      | <i>Yes</i>                      | <i>Yes</i>                     | <i>Yes</i>                     |
| N of review observations                    | 755,237                        | 353,908                        | 668,857                         | 440,288                         | 714,338                         | 394,807                         | 687,073                        | 422,072                        |
| R-squared                                   | 0.06                           | 0.09                           | 0.05                            | 0.07                            | 0.06                            | 0.08                            | 0.07                           | 0.08                           |
| F-test<br>(d.f.)                            | 593.33***<br>(88)              | n/a<br>(89)                    | 425.51***<br>(88)               | n/a<br>(88)                     | n/a<br>(89)                     | 292.98***<br>(88)               | 11,735***<br>(89)              | 320.31***<br>(88)              |

+p<0.1, \*p<0.05, \*\*p<0.01, \*\*\*p<0.001; two-tailed tests; robust standard errors in parentheses

Note: Refuting a preference-based alternative explanation: Restricting sample to review-level observations of only above-average or only below-average ratings on dimensions of look, smell, taste, and feel of a beer does not alter key findings

**Table A8:** GEE Models: Effects of Beer Name Emotionality on Beer Appeal and Beer Authenticity for Breweries that Emerged in 1996 or later

|                                              | Model<br>(A8.1)              | Model<br>(A8.2)           | Model<br>(A8.3)              | Model<br>(A8.4)           | Model<br>(A8.5)           | Model<br>(A8.6)           |
|----------------------------------------------|------------------------------|---------------------------|------------------------------|---------------------------|---------------------------|---------------------------|
|                                              | <i>DV: Appeal</i>            |                           |                              | <i>DV: Authenticity</i>   |                           |                           |
| Density of beers (t-1)                       | -0.042*<br>(0.017)           | -0.043*<br>(0.017)        | -0.042*<br>(0.017)           | 3.581***<br>(0.590)       | 3.578***<br>(0.590)       | 3.578***<br>(0.590)       |
| Density of beers squared (t-1)               | 0.001*<br>(0.001)            | 0.001*<br>(0.001)         | 0.001*<br>(0.001)            | -0.156***<br>(0.018)      | -0.156***<br>(0.018)      | -0.156***<br>(0.018)      |
| Regional brewery = 1 (t-1)                   | -0.034***<br>(0.006)         | -0.033***<br>(0.006)      | -0.034***<br>(0.006)         | 1.944***<br>(0.267)       | 1.945***<br>(0.266)       | 1.945***<br>(0.266)       |
| Contract brewery =1 (t-1)                    | -0.042**<br>(0.015)          | -0.043**<br>(0.015)       | -0.042**<br>(0.015)          | 1.140***<br>(0.221)       | 1.143***<br>(0.221)       | 1.146***<br>(0.221)       |
| Adjunct brewery =1 (t-1)                     | -0.199***<br>(0.027)         | -0.199***<br>(0.027)      | -0.199***<br>(0.027)         | 0.803<br>(0.773)          | 0.824<br>(0.773)          | 0.825<br>(0.772)          |
| Acquired brewery =1 (t-1)                    | -0.047<br>(0.044)            | -0.047<br>(0.044)         | -0.046<br>(0.044)            | -8.350**<br>(2.823)       | -8.312**<br>(2.816)       | -8.309**<br>(2.816)       |
| Brewery tenure (t)                           | -0.016***<br>(0.001)         | -0.016***<br>(0.001)      | -0.016***<br>(0.001)         | -0.094**<br>(0.029)       | -0.093**<br>(0.029)       | -0.092**<br>(0.029)       |
| Brewery cumulative<br>beer style count (t-1) | 0.025***<br>(0.001)          | 0.025***<br>(0.001)       | 0.025***<br>(0.001)          | 0.210***<br>(0.059)       | 0.210***<br>(0.058)       | 0.209***<br>(0.058)       |
| Average reviewer experience (t-1)            | 0.001+<br>(0.001)            | 0.001+<br>(0.001)         | 0.001+<br>(0.001)            | -0.049***<br>(0.014)      | -0.049***<br>(0.014)      | -0.049***<br>(0.014)      |
| Beer cumulative medals won (t-1)             | 0.032***<br>(0.007)          | 0.032***<br>(0.007)       | 0.032***<br>(0.007)          | 2.525**<br>(0.782)        | 2.525**<br>(0.782)        | 2.525**<br>(0.782)        |
| American lager style dummy = 1               | -0.577***<br>(0.024)         | -0.580***<br>(0.024)      | -0.577***<br>(0.024)         | -1.751***<br>(0.223)      | -1.763***<br>(0.223)      | -1.749***<br>(0.223)      |
| Beer name word count                         | -0.009***<br>(0.003)         | -0.009***<br>(0.003)      | -0.009***<br>(0.003)         | -0.059<br>(0.047)         | -0.061<br>(0.047)         | -0.062<br>(0.047)         |
| Oppositional beer name = 1                   | 0.146***<br>(0.013)          | 0.142***<br>(0.013)       | 0.147***<br>(0.013)          | 0.111<br>(0.192)          | 0.118<br>(0.191)          | 0.134<br>(0.192)          |
| Beer review word count (t-1)                 |                              |                           |                              | 0.109**<br>(0.041)        | 0.109**<br>(0.041)        | 0.109**<br>(0.041)        |
| Beer perceived authenticity (t-1)            | 0.002***<br>(0.000)          | 0.002***<br>(0.000)       | 0.002***<br>(0.000)          |                           |                           |                           |
| <b>Beer name positive emotionality</b>       | <b>-0.188***<br/>(0.041)</b> |                           | <b>-0.188***<br/>(0.041)</b> | <b>-0.795<br/>(0.531)</b> |                           | <b>-0.802<br/>(0.532)</b> |
| <b>Beer name negative emotionality</b>       |                              | <b>0.075*<br/>(0.035)</b> | <b>0.076*<br/>(0.035)</b>    |                           | <b>2.132*<br/>(0.867)</b> | <b>2.135*<br/>(0.867)</b> |
| Constant                                     | 4.075***<br>(0.162)          | 4.073***<br>(0.162)       | 4.072***<br>(0.162)          | -15.125**<br>(4.924)      | -15.202**<br>(4.930)      | -15.197**<br>(4.930)      |
| Beer style dummies                           | <i>Yes</i>                   | <i>Yes</i>                | <i>Yes</i>                   | <i>Yes</i>                | <i>Yes</i>                | <i>Yes</i>                |
| Year dummies                                 | <i>Yes</i>                   | <i>Yes</i>                | <i>Yes</i>                   | <i>Yes</i>                | <i>Yes</i>                | <i>Yes</i>                |
| State dummies                                | <i>Yes</i>                   | <i>Yes</i>                | <i>Yes</i>                   | <i>Yes</i>                | <i>Yes</i>                | <i>Yes</i>                |
| N of beers                                   | 13,577                       | 13,577                    | 13,577                       | 12,427                    | 12,427                    | 12,427                    |
| N of beer-year observations                  | 35,571                       | 35,571                    | 35,571                       | 32,213                    | 32,213                    | 32,213                    |
| Scale parameter                              | 0.1728                       | 0.1731                    | 0.1726                       | 90.860                    | 90.702                    | 90.689                    |
| Wald Chi-square<br>(d.f.)                    | 2,570.25<br>86               | 2,559.43<br>86            | 2,576.70<br>87               | 2,014.91<br>86            | 2,016.49<br>86            | 2,018.23<br>87            |

+p<0.1, p<0.05, \*\*p<0.01, \*\*\*p<0.001; two-tailed tests; robust standard errors clustered on beer in parentheses  
Note: Refuting a brewery reputation-based alternative explanation: Restricting sample to beer-year observations of breweries that did not exist before 1996 (the launch year of the BeerAdvocate website) does not alter key findings
